# Supplementary material for: Ecdysone signaling mediates the trade-off between immunity and reproduction via suppression of amyloids in the mosquito Aedes aegypti
Source: PubMed Central journal article supplement (PMC9531809; doi:10.1371/journal.ppat.1010837), 2022-09-22
Supplement: ppat.1010837.s008.pdf [file ppat.1010837.s008.pdf]

**S1Table. Used antibodies and oligonucleotides**

| Antibodies or Oligonucleotides                             | SOURCE                     | IDENTIFIER          |
|------------------------------------------------------------|----------------------------|---------------------|
| Antibodies                                                 |                            |                     |
| Anti-V5                                                    | Thermo Fisher Science      | Cat# R96025         |
| Anti-GST                                                   | Proteintech                | Cat# 10000-0-AP-100 |
| Anti-His                                                   | TIANGEN                    | Lot# U9023          |
| Anti-Vg                                                    | Beijing Protein Innovation | N/A                 |
| Anti-PGRP-LC                                               | Beijing Protein Innovation | N/A                 |
| Anti-Rel2                                                  | Beijing Protein Innovation | N/A                 |
| Anti-GAPDH                                                 | EASYBIO                    | Cat# BE0024-10      |
| Anti-Histone H3                                            | EASYBIO                    | Cat# BE3021-100     |
| Anti-beta-Actin-HRP                                        | EASYBIO                    | Cat# BE0033-100     |
| Anti-rabbit IgG(H&L)-HRP<br>Conjugated                     | EASYBIO                    | Cat# BE0101-100     |
| Anti-mouse IgG(H&L)-HRP<br>Conjugated                      | EASYBIO                    | Cat# BE0102-100     |
| Anti-HA                                                    | EASYBIO                    | Cat# BE2007-100     |
| Anti-mouse Alexa Fluor 546                                 | Invitrogen                 | Cat# A11030         |
| Anti-rabbit Alexa Fluor 488                                | Invitrogen                 | Cat# A27034         |
| Anti-rabbit Alexa Fluor 568                                | Invitrogen                 | Cat# A11036         |
| Oligonucleotides                                           |                            |                     |
| EcRE1 of Pirk-like:<br>AATTCATATAACTCAAAAAGTAAATA<br>ACTTG | This paper                 | N/A                 |
| EcRE2 of Pirk-like:<br>TCTTTTGAGTTTGGTGAATTCAAGAA          | This paper                 | N/A                 |

---

|                                                          |            |     |
|----------------------------------------------------------|------------|-----|
| EcRE2 mutant of Pirk-like:<br>TCTTTTGAGTCTGGCAAATTCAAGAA | This paper | N/A |
| Primer <i>EcR</i> forward:<br>GGTTATGATGTTGCGAATGG       | This paper | N/A |
| Primer <i>EcR</i> reverse:<br>GCAGGTCCTCTATCGTGTC        | This paper | N/A |
| Primer <i>Dpt</i> forward:<br>TGTCATCCGAGTGAGACGT        | This paper | N/A |
| Primer <i>Dpt</i> reverse:<br>CTCCCTGAAATCCACCAAAA       | This paper | N/A |
| Primer <i>CecB</i> forward:<br>AAGCTGGTCGGCTGAAGAAG      | This paper | N/A |
| Primer <i>CecB</i> reverse:<br>ATCTTCCCAGTCCCTTGATG      | This paper | N/A |
| Primer <i>DefC</i> forward:<br>GCCTCAGTGCAATCTTCA        | This paper | N/A |
| Primer <i>DefC</i> reverse:<br>CGTTTCAAGCGGAAGTTTT       | This paper | N/A |
| Primer <i>GAM</i> forward:<br>GCCAAAACCTGTTCTCTTG        | This paper | N/A |
| Primer <i>GAM</i> reverse:<br>CGATGTAGCATTCCGGTGATG      | This paper | N/A |
| Primer <i>Pirk-like</i> forward:<br>TAAATCACCGCTCGCTACAT | This paper | N/A |
| Primer <i>Pirk-like</i> reverse:<br>TGCAACTGACTATCGAACCC | This paper | N/A |
| Primer <i>PGRP-LC</i> forward:<br>AACTTTCTGATCGGAGGTGA   | This paper | N/A |
| Primer <i>PGRP-LC</i> reverse:<br>ACGCTATGCCAATACTGTCG   | This paper | N/A |
| Primer <i>IMD</i> forward:<br>GCAACAGGTGTCCAGGTTTA       | This paper | N/A |

---

---

|                                                     |            |     |
|-----------------------------------------------------|------------|-----|
| Primer <i>IMD</i> reverse:<br>ACTCCATCATCTGCCGAATT  | This paper | N/A |
| Primer <i>Rel2</i> forward:<br>GGATGCGGTGTCGGTTGGTC | This paper | N/A |
| Primer <i>Rel2</i> reverse:<br>CGTCCTTGGCTTGGCTGTTG | This paper | N/A |
| Primer <i>Vg</i> forward:<br>CCAGAAGACGTGAGCATTCA   | This paper | N/A |
| Primer <i>Vg</i> reverse:<br>TGGCGCAGATGATAGAACAG   | This paper | N/A |
| Primer <i>EcRA</i> forward:<br>GCACAGGGACAGCAGGTGAT | This paper | N/A |
| Primer <i>EcRA</i> reverse:<br>AATCGTGGTAGCATTGAGGG | This paper | N/A |
| Primer <i>EcRB</i> forward:<br>GTGGGAGTGTTGTTGAGTTT | This paper | N/A |
| Primer <i>EcRB</i> reverse:<br>CACCATTGTTGGACCATCTT | This paper | N/A |

---
