# Supplementary material for: Ecdysone signaling mediates the trade-off between immunity and reproduction via suppression of amyloids in the mosquito Aedes aegypti
Source: PubMed Central journal article supplement (PMC9531809; doi:10.1371/journal.ppat.1010837), 2022-09-22
Supplement: ppat.1010837.s009.pdf [file ppat.1010837.s009.pdf]

**S2Table. Differentially expressed IMRGs in iEcR and iEGFP mosquito fat bodies with *E. cloacae* infection.** Genes with a minimum fold change of 2-fold and a false discovery rate-adjusted p-value (q-value) of < 0.05 were considered differentially expressed.

| GeneID     | iEcR_Ec  | iEcR_PBS  | iEGFP_Ec  | iEGFP_PBS | GeneName |
|------------|----------|-----------|-----------|-----------|----------|
| AAEL002301 | 106.363  | 92.39     | 94.6767   | 43.8167   | CLIPA5   |
| AAEL000074 | 99.4367  | 74.7267   | 74.3867   | 37.1267   | CLIPB1   |
| AAEL014349 | 30.3233  | 28.2467   | 24.6067   | 12.43     | CLIPB15  |
| AAEL001084 | 1.93667  | 0.913333  | 1.42      | 0.706667  | CLIPB21  |
| AAEL014140 | 43.3233  | 37.17     | 22.66     | 17.94     | CLIPB24  |
| AAEL006674 | 179.89   | 118.733   | 67.2067   | 75.21     | CLIPB29  |
| AAEL000099 | 78.4867  | 57.9033   | 49.1833   | 31.3333   | CLIPB33  |
| AAEL004948 | 6.76667  | 2.46667   | 2.11      | 2.65667   | CLIPC14  |
| AAEL000224 | 2.69     | 1.37      | 1.63      | 0.853333  | CLIPD7   |
| AAEL011453 | 18.2867  | 9.40333   | 14.9      | 7.90667   | CTL14    |
| AAEL013853 | 1.4      | 0.47      | 0.396667  | 0.406667  | CTLGA2   |
| AAEL014357 | 0.78     | 0.393333  | 0.313333  | 0.306667  | CTLSE2   |
| AAEL004522 | 2.45     | 0.103333  | 0.206667  | 0.253333  | GAM      |
| AAEL012069 | 94.75    | 66.14     | 67.4133   | 37.78     | GPXH1    |
| AAEL011764 | 0.693333 | 0.14      | 0.21      | 0.223333  | PPO10    |
| AAEL013496 | 3.07     | 0.533333  | 0.693333  | 0.79      | PPO8     |
| AAEL002720 | 98.5533  | 74.6233   | 60.7233   | 31.5933   | SRPN20   |
| AAEL013936 | 27.8633  | 17.8367   | 21.0867   | 11.5067   | SRPN4A   |
| AAEL013441 | 3.70333  | 1.23333   | 1.06667   | 1.25      | TOLL9A   |
| AAEL011009 | 1.26     | 0.57      | 0.46      | 0.383333  | FREP8    |
| AAEL011007 | 28.63    | 7.84      | 13.5733   | 6.18667   | FREP9    |
| AAEL014078 | 109.483  | 61.15     | 96.68     | 38.9733   | SRPN2    |
| AAEL002585 | 50.5067  | 38.31     | 35.6233   | 13.34     | CLIPA11  |
| AAEL002629 | 223.743  | 142.97    | 69.0533   | 38.0667   | CLIPA6   |
| AAEL008668 | 4.61333  | 2.59333   | 3.18      | 0.993333  | CLIPB22  |
| AAEL000037 | 78.8967  | 84.6267   | 46.8033   | 15.8733   | CLIPB35  |
| AAEL022578 | 252.703  | 222.843   | 247.523   | 82.4433   | CLIPB8   |
| AAEL011991 | 6.73     | 5.22333   | 4.87333   | 1.71      | CLIPC1   |
| AAEL009338 | 3.10667  | 3.54667   | 3.44667   | 6.18667   | CTL10    |
| AAEL005482 | 22.54    | 8.17667   | 14.78     | 2.31333   | CTL18    |
| AAEL018207 | 0.266667 | 0.133333  | 1.13333   | 0.466667  | CTL8     |
| AAEL011455 | 28.05    | 21.1367   | 7.11333   | 8.15333   | CTLMA12  |
| AAEL000563 | 6.46     | 8.09333   | 3.74333   | 2.51667   | CTLMA15  |
| AAEL003832 | 9.17333  | 0.746667  | 280.56    | 1.90333   | DEFC     |
| AAEL004833 | 28.86    | 38.4967   | 8.81      | 9.54667   | DPT      |
| AAEL006704 | 3.21     | 0.0233333 | 0.0966667 | 0.953333  | FREP18   |
| AAEL003294 | 7.34333  | 1.5       | 10.2733   | 25.3567   | FREP3    |
| AAEL003844 | 139.92   | 141.357   | 121.677   | 50.1533   | GALE5    |
| AAEL009906 | 4.17     | 3.03333   | 3.45      | 10.1067   | PDLIM2   |

|            |          |           |           |          |           |
|------------|----------|-----------|-----------|----------|-----------|
| AAEL010171 | 2.36     | 1.76667   | 5.18667   | 0.51     | PGRPLB    |
| AAEL019745 | 158.48   | 215.73    | 89.54     | 59.6967  | PGRPLD    |
| AAEL021557 | 3.86333  | 0.33      | 11.3      | 1.11667  | Pirk-like |
| AAEL013492 | 3        | 1.28333   | 4.15333   | 5.54     | PPO5      |
| AAEL002731 | 5.96333  | 2.44667   | 4.93      | 0.686667 | SRPN14    |
| AAEL011777 | 3.83667  | 6.19      | 8.61667   | 1.65333  | SRPN8     |
| AAEL002309 | 24.8833  | 3.83333   | 5.63      | 10.58    | TPX4      |
| AAEL006568 | 233.543  | 81.1833   | 54.4967   | 10.3733  | SRPN      |
| AAEL008118 | 0.46     | 0.22      | 0.406667  | 0.463333 | cGAS      |
| AAEL014137 | 5.61667  | 1.61667   | 6.00333   | 6.52667  | CLIPB25   |
| AAEL027429 | 0.546667 | 0.286667  | 0.463333  | 0.663333 | CLIPB76   |
| AAEL007992 | 3.17333  | 0.753333  | 2.77333   | 1.91     | CLIPB78   |
| AAEL007796 | 1.22     | 0.39      | 0.93      | 0.756667 | CLIPD1    |
| AAEL002124 | 5.87333  | 3.34333   | 8.97      | 6.17667  | CLIPD6    |
| AAEL018265 | 1.40667  | 0.82      | 1.47      | 1.55333  | CTL9      |
| AAEL019868 | 10.29    | 0.816667  | 8.19      | 4.9      | FREP17    |
| AAEL002354 | 0.256667 | 0.0866667 | 0.566667  | 0.31     | HPX5      |
| AAEL012380 | 2.38333  | 6.24      | 2.69      | 2.08333  | PGRPLA    |
| AAEL015116 | 1.70333  | 0.573333  | 0.996667  | 0.92     | PPO1      |
| AAEL011763 | 1.63667  | 0.466667  | 1.11667   | 1.19     | PPO3      |
| AAEL013501 | 2.45     | 0.47      | 2.09      | 2.74333  | PPO4      |
| AAEL020579 | 1.33667  | 0.343333  | 0.706667  | 0.796667 | PPO9      |
| AAEL027694 | 2.75     | 1.34      | 2.80667   | 3.95667  | SCRASP3   |
| AAEL005979 | 4.59     | 2.01333   | 4.97667   | 3.87667  | SCRB3     |
| AAEL000256 | 1.79667  | 0.966667  | 1.45      | 1.90667  | SCRB9     |
| AAEL009423 | 81.73    | 116.557   | 71.9133   | 44.6133  | SCRBQ2    |
| AAEL019958 | 1.48     | 0.263333  | 1.91333   | 1.96333  | TEP21     |
| AAEL015019 | 1.75     | 0.4       | 2.31333   | 2.51667  | TOLL4     |
| AAEL006649 | 3.68     | 2.58667   | 3.58667   | 5.25333  | TRAF4     |
| AAEL026744 | 0.54     | 0.0133333 | 0.0133333 | 0.323333 | CASPS20   |
| AAEL010270 | 2.98     | 7.47      | 10.3767   | 2.90667  | CLIPC15   |
| AAEL019781 | 17.4767  | 7.95333   | 50.69     | 20.69    | CLIFE11   |
| AAEL005792 | 2.99667  | 1.08667   | 7.89667   | 2.36     | CLIFE8    |
| AAEL019639 | 2.9      | 0.323333  | 0.803333  | 3.07667  | HPX3      |
| AAEL009474 | 27.5933  | 13.8767   | 164.637   | 26.2833  | PGRPS1    |
| AAEL009432 | 5.33667  | 0.863333  | 0.99      | 2.48667  | SCRBQ3    |
| AAEL002704 | 3.96667  | 0.256667  | 0.266667  | 2.97     | SRPN23    |
| AAEL014896 | 1.52667  | 0.14      | 0.226667  | 0.746667 | TOLL9B    |
| AAEL005293 | 6.38667  | 0.9       | 1.38      | 5.81     | GALE8A    |
| AAEL029047 | 7.57667  | 0         | 725.393   | 0.75     | CECN      |
| AAEL002601 | 68.7167  | 32.1967   | 78.5867   | 25.9333  | CLIPA1    |
| AAEL002595 | 201.177  | 97.55     | 127.933   | 48.9767  | CLIPA14   |
| AAEL015430 | 17.2267  | 10.09     | 10.7467   | 3.97667  | CLIPB19   |
| AAEL007993 | 0.503333 | 0.206667  | 2.83      | 0.126667 | CLIPB27   |

|            |         |           |          |          |            |
|------------|---------|-----------|----------|----------|------------|
| AAEL013245 | 28.6767 | 19.7167   | 27.1767  | 10.6133  | CLIPB28    |
| AAEL005093 | 18.24   | 5.21333   | 30.7967  | 7.45333  | CLIPB46    |
| AAEL011375 | 0.84    | 0.16      | 0.553333 | 0.223333 | CLIPD11    |
| AAEL019767 | 24.23   | 8.37      | 27.4833  | 10.1767  | CLIP-novel |
| AAEL012353 | 5.86333 | 0.876667  | 5.05667  | 1.71     | CTL15      |
| AAEL003857 | 18.2367 | 0.313333  | 898.757  | 1.6      | DEFD       |
| AAEL027792 | 9.46    | 0.246667  | 76.3867  | 0.636667 | DEFE       |
| AAEL003723 | 19.67   | 6.64      | 346.097  | 4.93     | LYSC11     |
| AAEL001794 | 36.02   | 9.76      | 54.2533  | 10.45    | TEP20      |
| AAEL008607 | 29.03   | 11.09     | 32.1267  | 12.1067  | TEP3       |
| AAEL014078 | 109.483 | 61.15     | 96.68    | 38.9733  | SRPN2      |
| AAEL008404 | 0.67    | 0.283333  | 1.28     | 0.356667 | CLIPA16    |
| AAEL005431 | 24.4867 | 15.6833   | 40.0433  | 10.9233  | CLIPB37    |
| AAEL003632 | 5.03333 | 2.94333   | 5.76667  | 2.48667  | CLIPB39    |
| AAEL012711 | 3.93333 | 3.7       | 2.40333  | 4.98333  | CLIPC12    |
| AAEL000238 | 0.31    | 0.0866667 | 0.593333 | 0.156667 | CLIPD9     |
| AAEL005641 | 45.4033 | 43.7833   | 115.51   | 22.6167  | CTLGA5     |
| AAEL014382 | 64.4333 | 66.2367   | 246.42   | 45.0633  | CTLMA14    |
