# Supplementary material for: Ecdysone signaling mediates the trade-off between immunity and reproduction via suppression of amyloids in the mosquito Aedes aegypti
Source: PubMed Central journal article supplement (PMC9531809; doi:10.1371/journal.ppat.1010837), 2022-09-22
Supplement: ppat.1010837.s010.pdf [file ppat.1010837.s010.pdf]

**S3Table. Differentially expressed IMRGs in Pirk-like<sup>-/-</sup> and WT mosquito fat bodies with *E. cloacae* infection.**

Genes with a minimum fold change of 2-fold and a false discovery rate-adjusted p-value (q-value) of < 0.05 were considered differentially expressed.

| GeneID     | Pirk-like <sup>-/-</sup> _Ec12h | Pirk-like <sup>-/-</sup> _Ec24h | Pirk-like <sup>-/-</sup> _PBS12h | Pirk-like <sup>-/-</sup> _PBS24h | WT_Ec12h    | WT_Ec24h    | WT_PBS12h    | WT_PBS24h    | GeneName |
|------------|---------------------------------|---------------------------------|----------------------------------|----------------------------------|-------------|-------------|--------------|--------------|----------|
| AAELO02585 | 90.7867                         | 185.073                         | 81.03                            | 127.97                           | 30.21<br>67 | 64.10<br>67 | 15.153<br>3  | 29.186<br>7  | CLIPA11  |
| AAELO03253 | 11.6867                         | 11.5233                         | 25.2133                          | 6.28667                          | 9.35        | 11.13<br>33 | 4.7133<br>3  | 15.513<br>3  | CLIPB13B |
| AAELO14349 | 55.0733                         | 171.327                         | 39.4667                          | 51.74                            | 21.49<br>33 | 20.55<br>67 | 10.81        | 12.7         | CLIPB15  |
| AAELO06674 | 72.2267                         | 225.323                         | 57.0767                          | 156.03                           | 63.17<br>33 | 212.1<br>4  | 27.94        | 187.91<br>7  | CLIPB29  |
| AAELO03632 | 4.03667                         | 18.16                           | 11.9667                          | 7.91333                          | 7.173<br>33 | 1.876<br>67 | 3.4          | 1.2666<br>7  | CLIPB39  |
| AAELO06168 | 87.0067                         | 59.15                           | 89.7867                          | 52.97                            | 70.61<br>33 | 27.25<br>33 | 35.116<br>7  | 10.776<br>7  | CLIPB42  |
| AAELO05093 | 39.0433                         | 124.873                         | 46.4633                          | 55.5                             | 13.55<br>33 | 29.94       | 4.4133<br>3  | 9.58         | CLIPB46  |
| AAELO00224 | 0.153333                        | 0.076666<br>7                   | 0.106667                         | 0.0266667                        | 2.46        | 5.256<br>67 | 0.7366<br>67 | 7.3766<br>7  | CLIPD7   |
| AAELO14141 | 19.2467                         | 35.43                           | 32.0333                          | 34.0767                          | 23.76       | 31.90<br>33 | 10.11        | 19.323<br>3  | SRPN5    |
| AAELO06568 | 6.68333                         | 20.8333                         | 0.54                             | 3.82333                          | 37.42<br>67 | 947.3<br>63 | 140.76<br>7  | 1035.7<br>3  | SRPN     |
| AAELO29047 | 577.217                         | 847.22                          | 411.823                          | 419.527                          | 25.87<br>67 | 61.72<br>67 | 1.9          | 0.9366<br>67 | CECN     |
| AAELO03857 | 1016.31                         | 1132.89                         | 432.797                          | 1302.59                          | 56.27       | 406.3<br>73 | 1.52         | 0.9          | DEFD     |
| AAELO03832 | 272.027                         | 156.347                         | 40.6833                          | 9.13333                          | 16.19<br>33 | 48.62<br>33 | 0.7266<br>67 | 0.53         | DEFC     |
| AAELO27792 | 94.3                            | 164.06                          | 71.43                            | 127.217                          | 3.793<br>33 | 200.5<br>63 | 1.8433<br>3  | 0.1633<br>33 | DEFE     |
| AAELO05641 | 211.58                          | 753.74                          | 217.437                          | 182.887                          | 34.63<br>33 | 118.5<br>5  | 6.0966<br>7  | 2.0766<br>7  | CTLGA5   |
| AAELO11621 | 3.69333                         | 5.74                            | 4.85667                          | 2.42667                          | 1.846<br>67 | 1.75        | 0.9266<br>67 | 1.4866<br>7  | CTLMA13  |
| AAELO19633 | 7.12333                         | 5.31333                         | 3.47667                          | 3.57                             | 1.91        | 1.603<br>33 | 0.87         | 0.99         | CTLGA9   |
| AAELO02524 | 11.0733                         | 12.4633                         | 6.97667                          | 8.33                             | 2.96        | 15.49<br>33 | 1.4433<br>3  | 4.0966<br>7  | CTL24    |
| AAELO00563 | 3.79667                         | 1.74                            | 3.65                             | 2.86                             | 6.266<br>67 | 7.86        | 2.5166<br>7  | 7.6766<br>7  | CTLMA15  |
| AAELO15404 | 57.2533                         | 98.2667                         | 105.79                           | 37.2167                          | 41.57<br>33 | 27.23       | 15.92        | 24.816<br>7  | LYSC7B   |

|                |          |          |          |          |              |             |              |              |        |
|----------------|----------|----------|----------|----------|--------------|-------------|--------------|--------------|--------|
| AAELO<br>15404 | 57.2533  | 98.2667  | 105.79   | 37.2167  | 41.57<br>33  | 27.23       | 15.92        | 24.816<br>7  | LYSC7A |
| AAELO<br>09474 | 173.01   | 175.823  | 60.7233  | 99.69    | 37.96<br>67  | 38.48<br>33 | 14.613<br>3  | 7.3133<br>3  | PGRPS1 |
| AAELO<br>10171 | 7.18     | 65.3367  | 3.04333  | 9.79333  | 1.8          | 3.803<br>33 | 0.83         | 1.4033<br>3  | PGRPLB |
| AAELO<br>14896 | 0.38     | 0.396667 | 0.31     | 1.08667  | 0.706<br>667 | 0.3         | 0.1666<br>67 | 0.4933<br>33 | TOLL9B |
| AAELO<br>15019 | 1.14333  | 2.68667  | 1.65333  | 0.95     | 2.503<br>33  | 10.55       | 1.12         | 3.42         | TOLL4  |
| AAELO<br>26478 | 0.463333 | 0.81     | 0.556667 | 0.92     | 1.23         | 1.903<br>33 | 2.8166<br>7  | 1.02         | TOLL2  |
| AAELO<br>11009 | 1.34667  | 2.06667  | 1.01667  | 0.713333 | 1.666<br>67  | 0.85        | 0.7533<br>33 | 0.7533<br>33 | FREP13 |
| AAELO<br>06704 | 466.607  | 927.803  | 78.7533  | 89.0133  | 123.1<br>83  | 1.28        | 2.51         | 0.1666<br>67 | FREP18 |
| AAELO<br>19868 | 21.2433  | 32.85    | 14.11    | 13.1     | 7.486<br>67  | 10.27<br>67 | 2.1533<br>3  | 1.9533<br>3  | FREP17 |
| AAELO<br>11009 | 1.34667  | 2.06667  | 1.01667  | 0.713333 | 1.666<br>67  | 0.85        | 0.7533<br>33 | 0.7533<br>33 | FREP8  |
